# Supplementary material for: Design, synthesis, anticancer activity and molecular docking of quinoline-based dihydrazone derivatives
Source: Royal Society of Chemistry journal article supplement (doi:10.1039/d4ra06954d), 2025-01-01
Supplement: d4ra06954d1.pdf [file d4ra06954d1.pdf]

## Supporting information:

### Design, Synthesis, Anticancer Activity and Molecular Docking of Quinoline-based Dihydrazone Derivatives

Jia-Xing Lu<sup>[a]</sup> · Hai-Rong Lan<sup>[a]</sup> · Dai Zeng<sup>[a]</sup> · Jun-Ying Song<sup>[b]</sup> · Ya-Ting Hao<sup>[a]</sup> ·  
Ai-Ping Xing<sup>\*[a]</sup> · Ao Shen<sup>\*[a]</sup> · Juan Yuan<sup>\*[a]</sup>

<sup>[a]</sup>School of Pharmacy, Henan University of Chinese Medicine, Zhengzhou 450046, P. R. China.

<sup>[b]</sup>Academy of Chinese Medical Sciences, Henan University of Chinese Medicine,  
Zhengzhou 450046, P. R. China.

#### Table of contents

**Scheme S1.** Mechanism of NDMA bio-activation leading to its mutagenesis and carcinogenicity.

**Figure S1.** <sup>1</sup>H NMR spectrum of **3a**.

**Figure S2.** <sup>13</sup>C NMR spectrum of **3a**.

**Figure S3.** ESI-HRMS spectrum of **3a**.

**Figure S4.** IR spectrum of **3a**.

**Figure S5.** <sup>1</sup>H NMR spectrum of **3b**.

**Figure S6.** <sup>13</sup>C NMR spectrum of **3b**.

**Figure S7.** ESI-HRMS spectrum of **3b**.

**Figure S8.** IR spectrum of **3b**.

**Figure S9.** <sup>1</sup>H NMR spectrum of **3c**.

**Figure S10.** <sup>13</sup>C NMR spectrum of **3c**.

**Figure S11.** ESI-HRMS spectrum of **3c**.

**Figure S12.** IR spectrum of **3c**.

**Figure S13.** <sup>1</sup>H NMR spectrum of **3d**.

**Figure S14.** <sup>13</sup>C NMR spectrum of **3d**.

**Figure S15.** ESI-HRMS spectrum of **3d**.

**Figure S16.** IR spectrum of **3d**.

**Figure S17.** UV-vis spectra of **3a-3d**.

**Figure S18.** Fluorescence spectra of **3a-3d**.

**Figure S19.** NDMA (a) and NDEA (b) represent the peaks on the chromatogram, as well as **compound 3a** (c-d), **3b** (e-f), **3c** (g-h), **3d** (i-j) detection chromatograms. (NDMA: a, c, e, g, i; NDEA: b, d, f, h, j).

**Figure S20.** UV-vis spectra of **3a** in Tris-HCl buffer (pH 7.4).

**Figure S21.** UV-vis spectra of **3b** in Tris-HCl buffer (pH 7.4).

**Figure S22.** UV-vis spectra of **3c** in Tris-HCl buffer (pH 7.4).

**Figure S23.** UV-vis spectra of **3d** in Tris-HCl buffer (pH 7.4).

**Figure S24.** UV-vis spectra of **3a** in PBS (pH 7.4).

**Figure S25.** UV-vis spectra of **3b** in PBS (pH 7.4).

**Figure S26.** UV-vis spectra of **3c** in PBS (pH 7.4).

**Figure S27.** UV-vis spectra of **3d** in PBS (pH 7.4).

**Figure S28.** IC<sub>50</sub> values of **3a-3d** against BGC-823, BEL-7402, A549 and MCF-7 cells for 48 h.

**Figure S29.** The UV-Vis spectra of **3a** in PBS buffer (pH 7.4) at 4°C.

**Figure S30.** The UV-Vis spectra of **3b** in PBS buffer (pH 7.4) at 4°C.

**Figure S31.** The UV-Vis spectra of **3c** in PBS buffer (pH 7.4) at 4°C.

**Figure S32.** The UV-Vis spectra of **3a** in PBS buffer (pH 7.4) at 4°C.

**Figure S23.** Stacking-based visualizations of **3b** and **3c** docking with DNA.

**Table S1.** Summary of Potential Nitrosamine Impurities Risk Assessment in API.

**Table S2.** The  $\Delta G_b^\theta$  of **3a-3d** interacting with CDK2 (PDB ID: 4BGH).

**Table S3.** The  $\Delta G_b^\theta$  of **3a-3d** interacting with CDK1 (PDB ID: 6GU7).

**Table S4.** The  $\Delta G_b^\theta$  of **3a-3d** interacting with CDK4 (PDB ID: 2W9Z).

**Table S5.** The  $\Delta G_b^\theta$  of **3a-3d** interacting with CDK8 (PDB ID: 5I5Z).

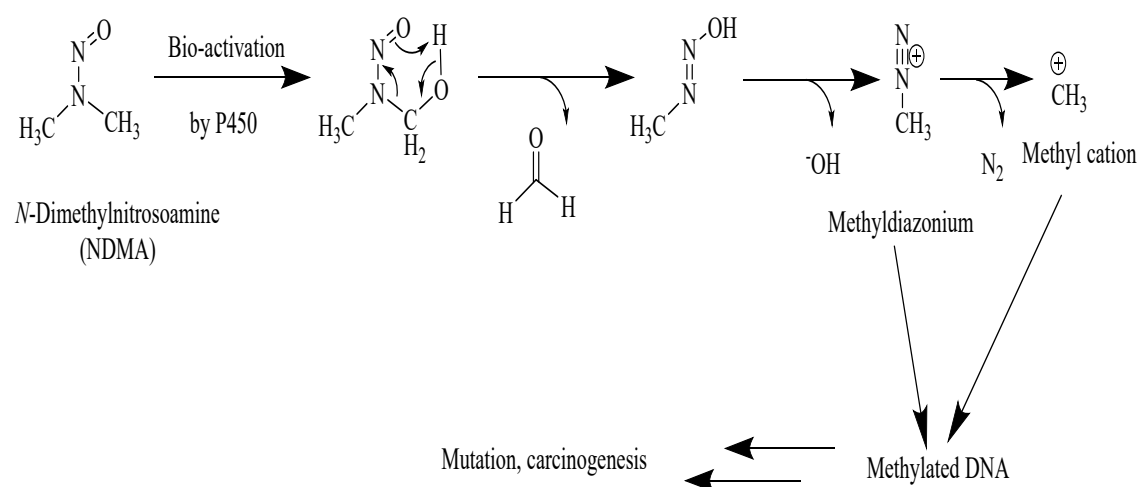

**Scheme S1.** Mechanism of NDMA bio-activation leading to its mutagenesis and carcinogenicity.

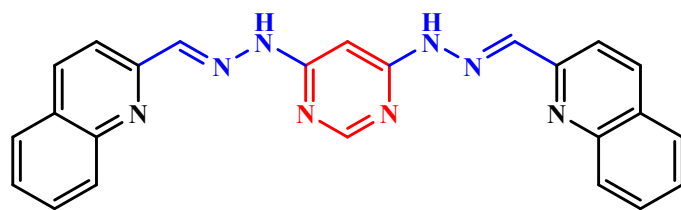

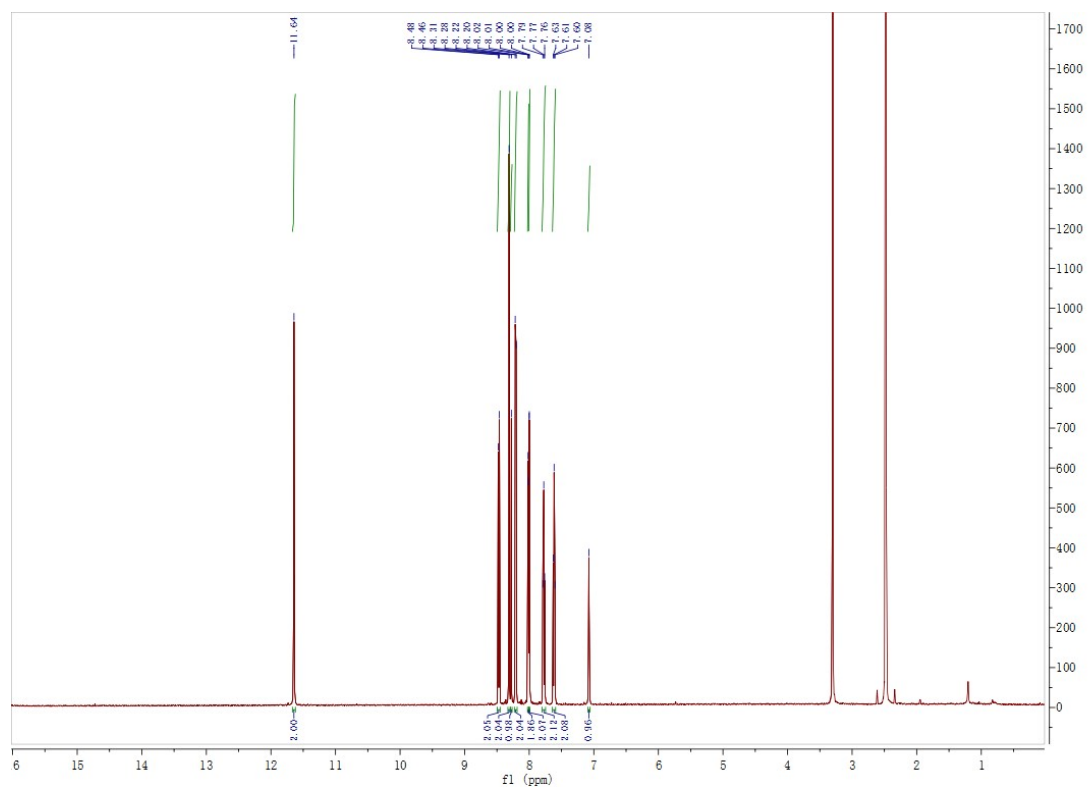

Figure S1  $^1\text{H}$  NMR spectrum of **3a** in DMSO- $d_6$ .

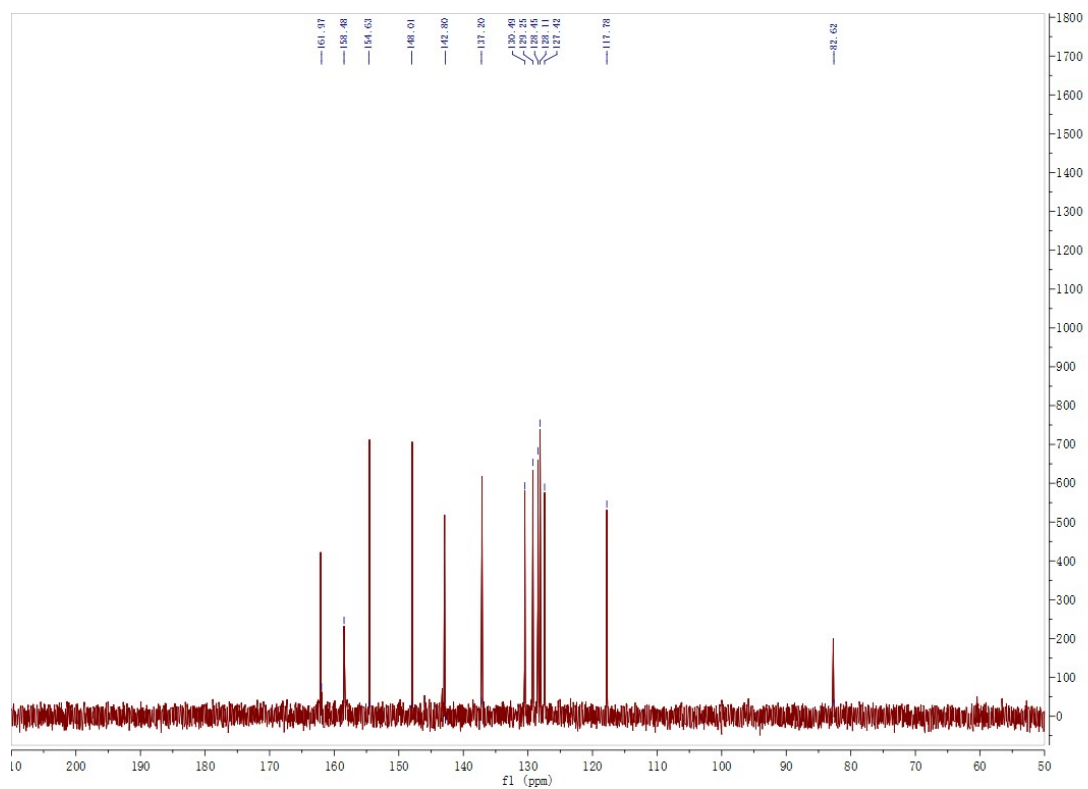

Figure S2  $^{13}\text{C}$  NMR spectrum of **3a** in DMSO- $d_6$ .

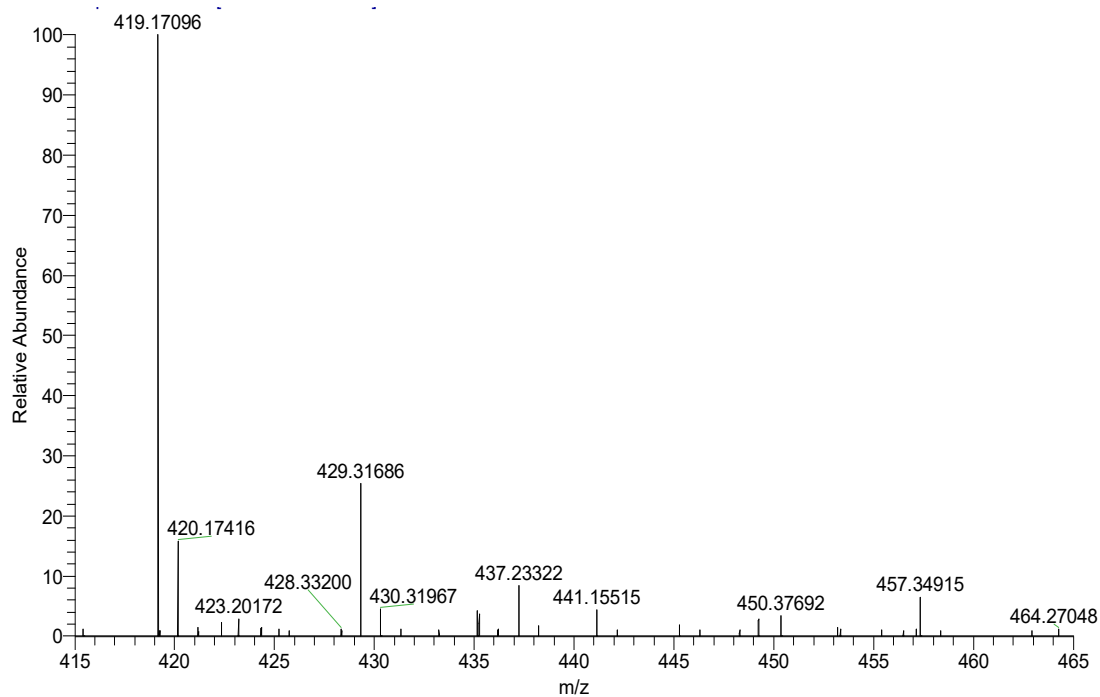

Figure S3 ESI-HRMS of **3a** at m/z 419.17096 for  $C_{24}H_{18}N_8$   $[M+H]^+$ .

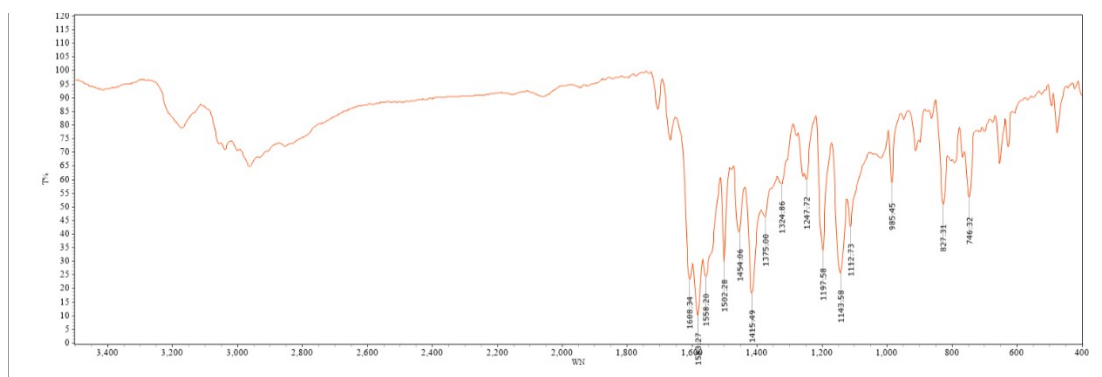

Figure S4 IR spectrum of **3a**.

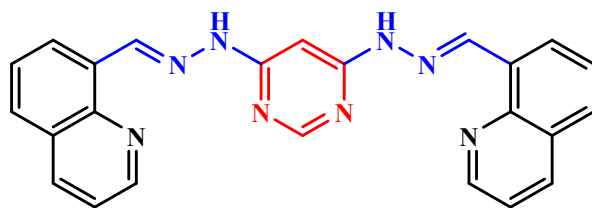

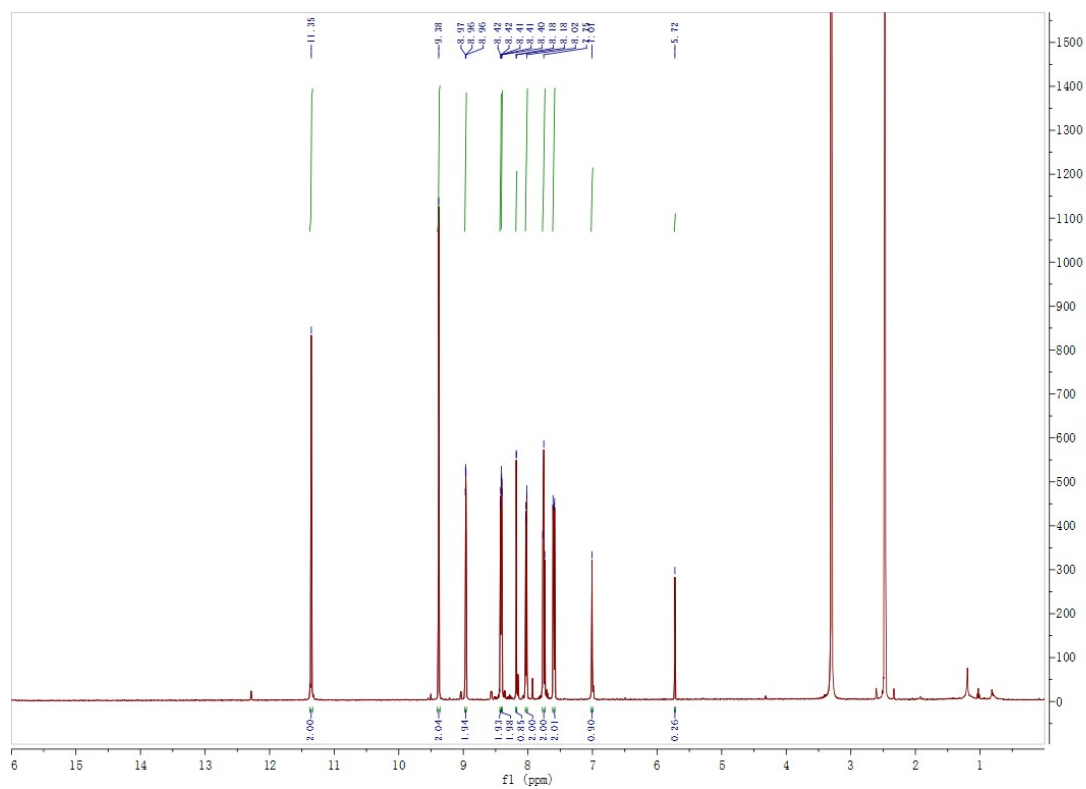

Figure S5  $^1\text{H}$  NMR spectrum of **3b** in DMSO- $d_6$ .

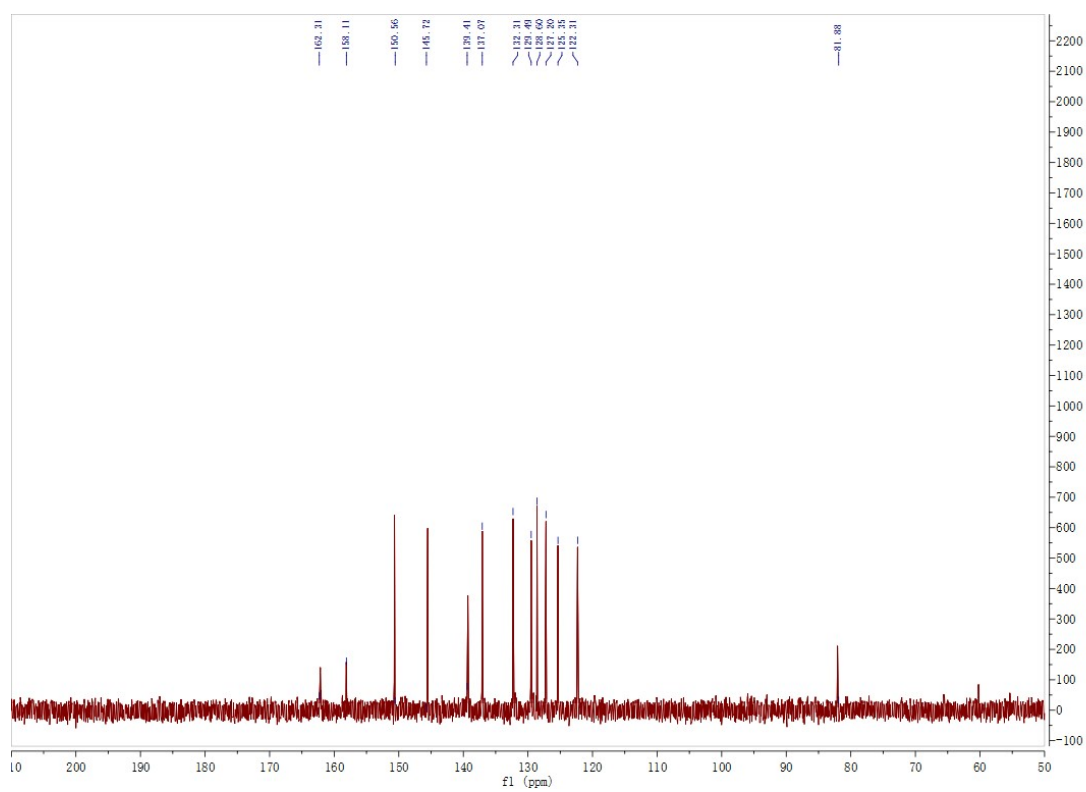

Figure S6  $^{13}\text{C}$  NMR spectrum of **3b** in DMSO- $d_6$ .

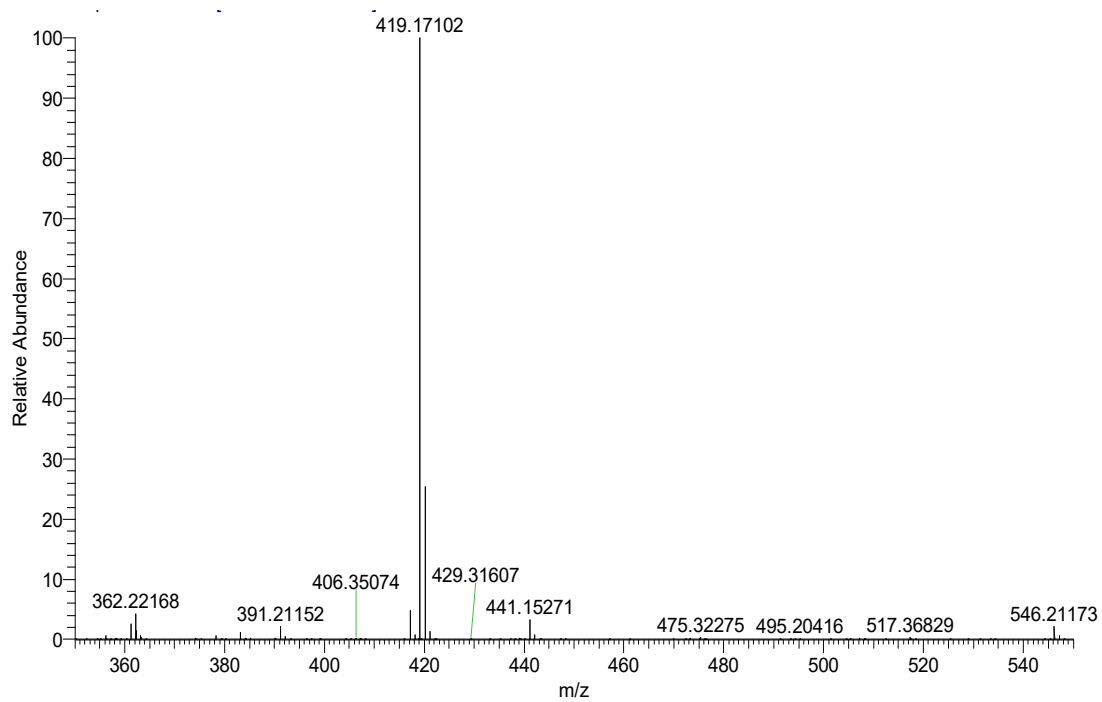

Figure S7 ESI-HRMS of **3b** at  $m/z$  419.17102 for  $C_{24}H_{18}N_8$   $[M+H]^+$ .

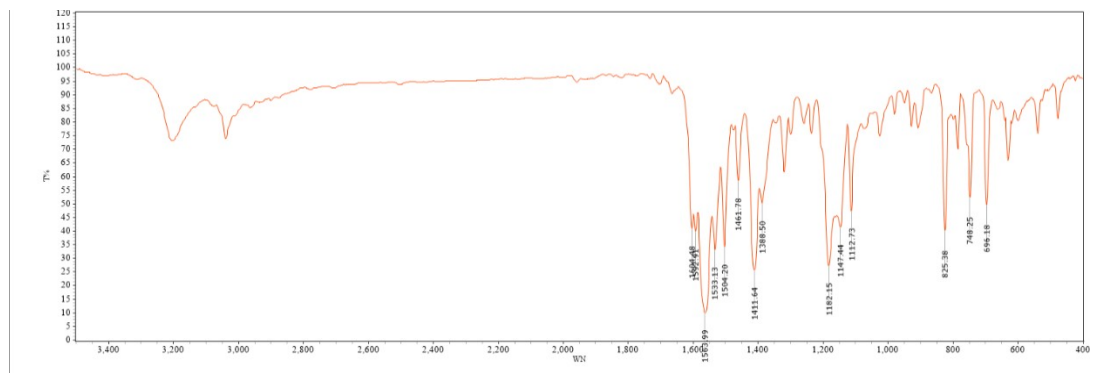

Figure S8 IR spectrum of **3b**.

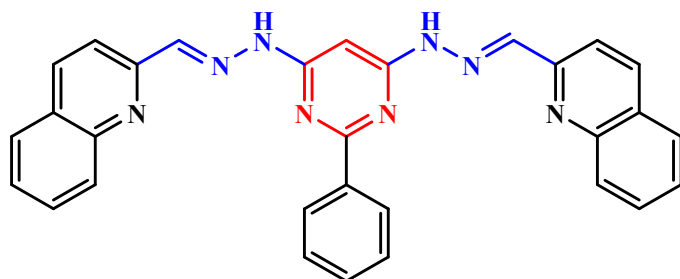

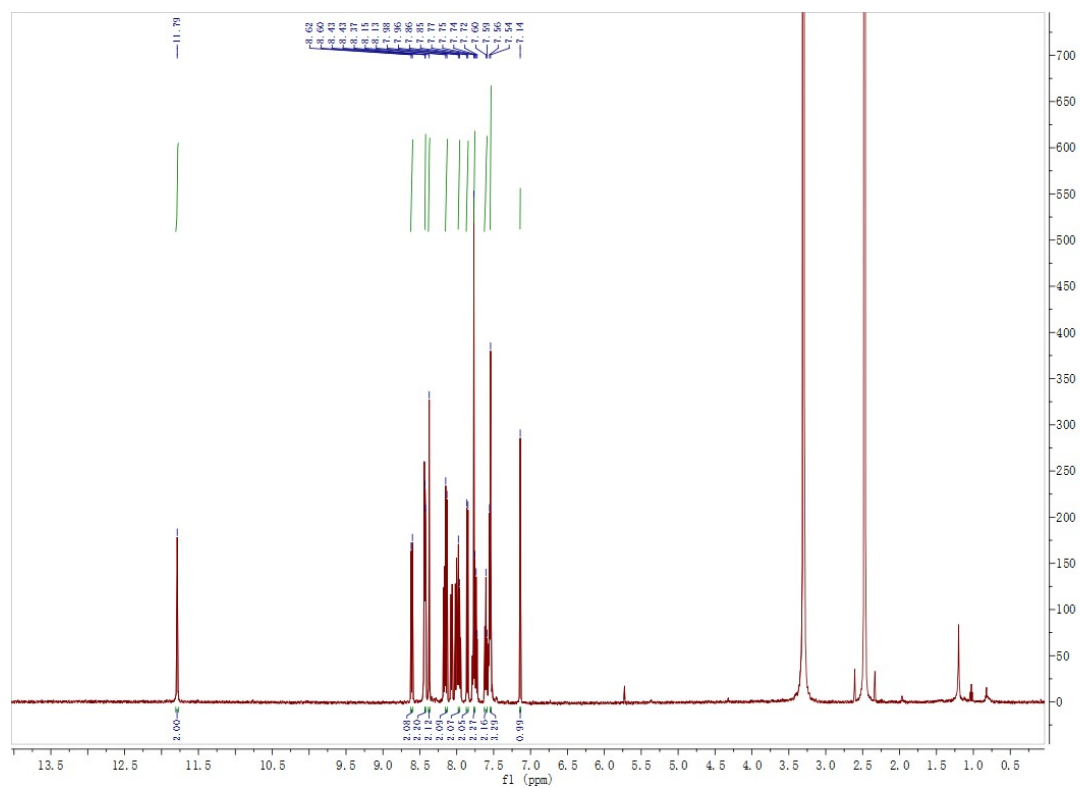

Figure S9  $^1\text{H}$  NMR spectrum of **3c** in DMSO-d<sub>6</sub>.

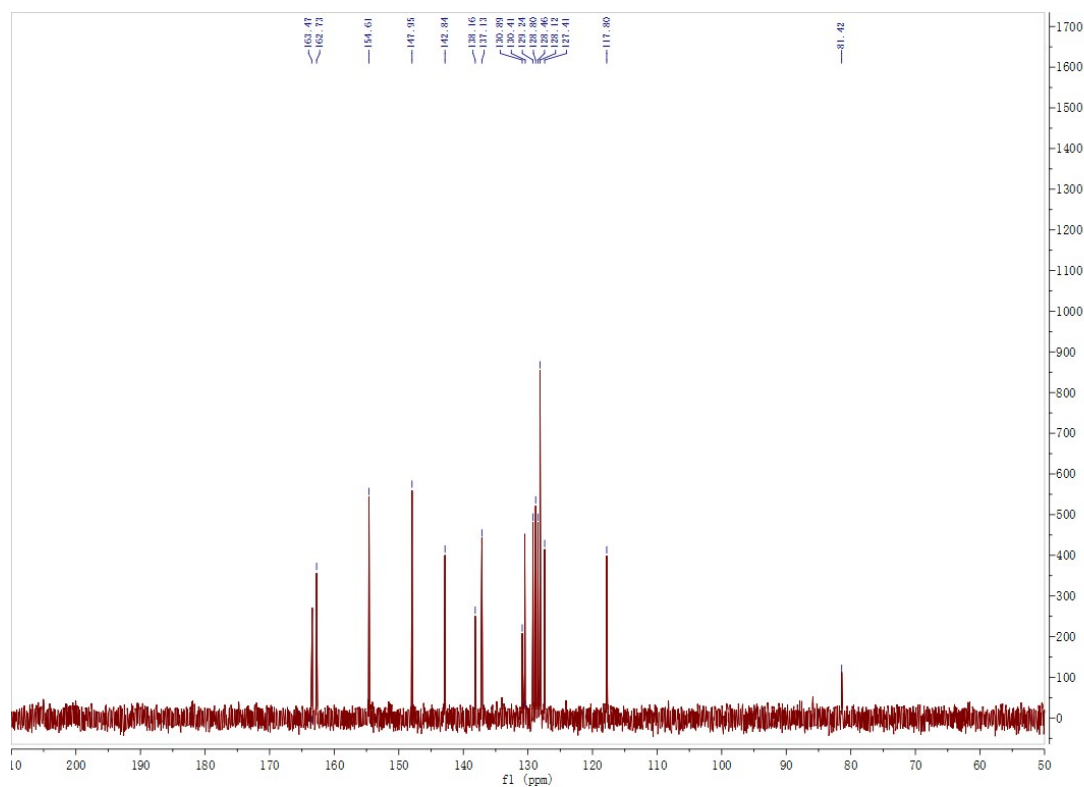

Figure S10  $^{13}\text{C}$  NMR spectrum of **3c** in DMSO-d<sub>6</sub>.

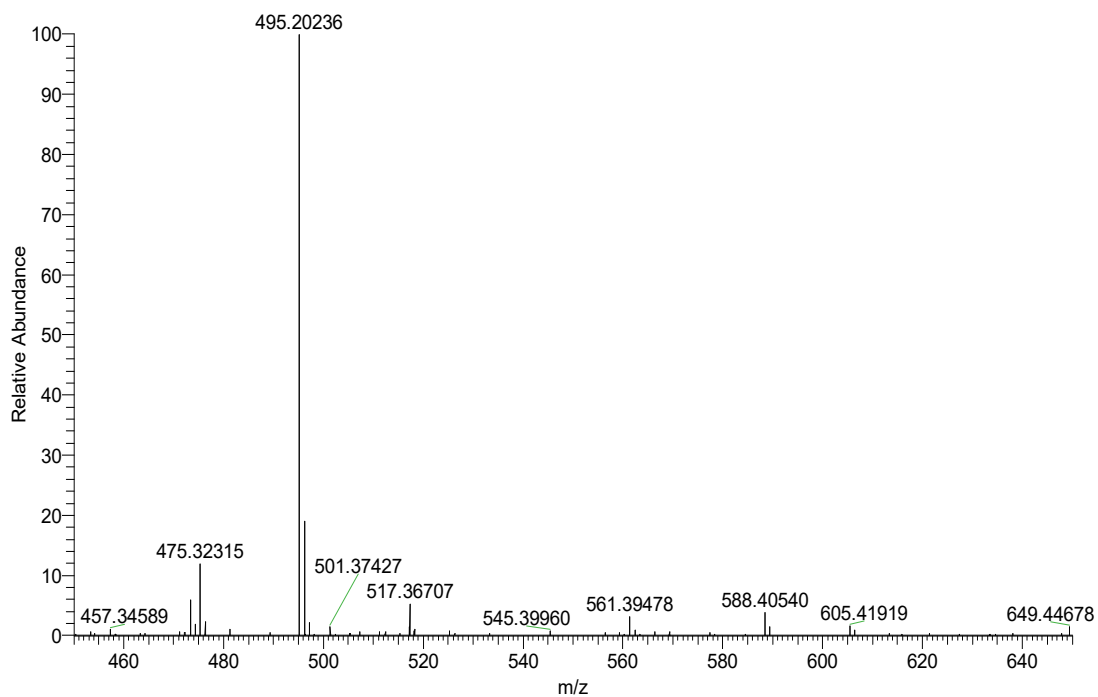

Figure S11 ESI-HRMS of **3c** at  $m/z$  495.20236 for  $C_{30}H_{22}N_8$   $[M+H]^+$ .

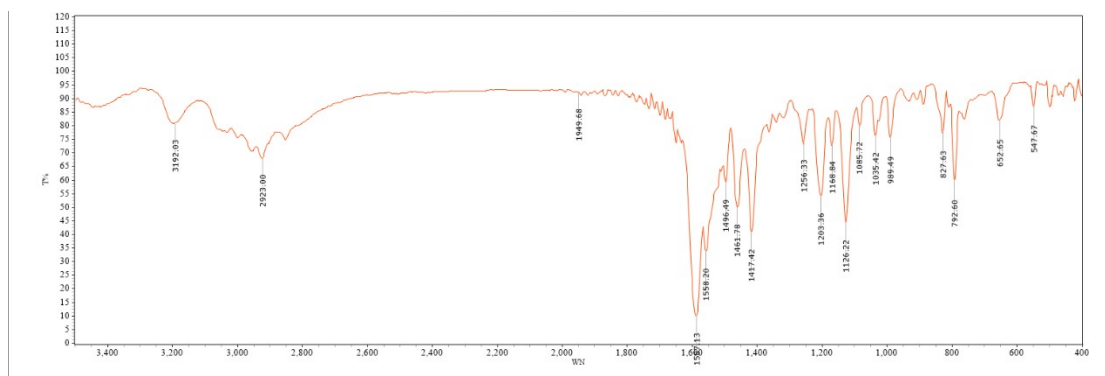

Figure S12 IR spectrum of **3c**.

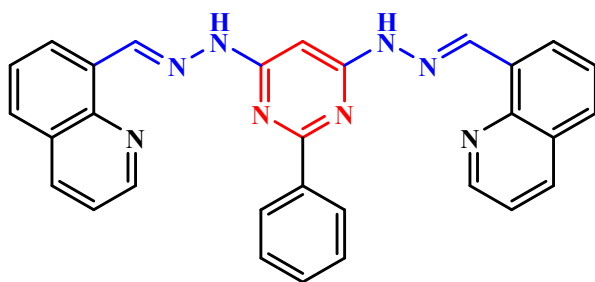



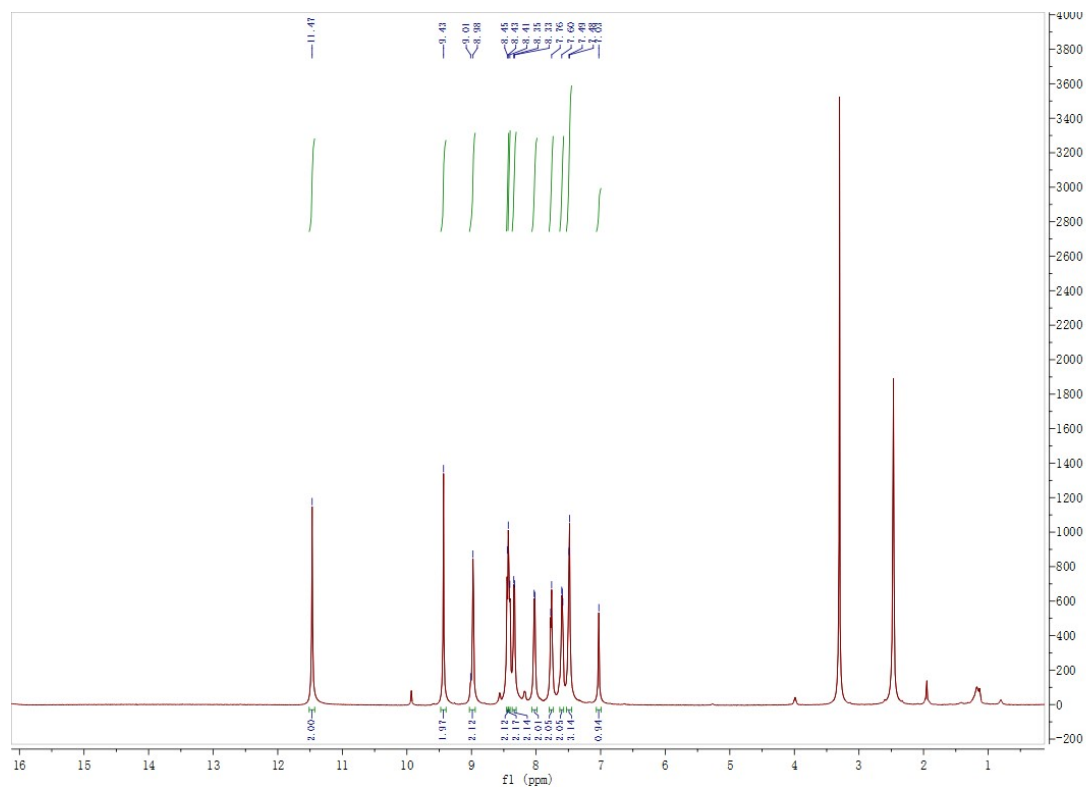

Figure S13  $^1\text{H}$  NMR spectrum of **3d** in DMSO- $d_6$

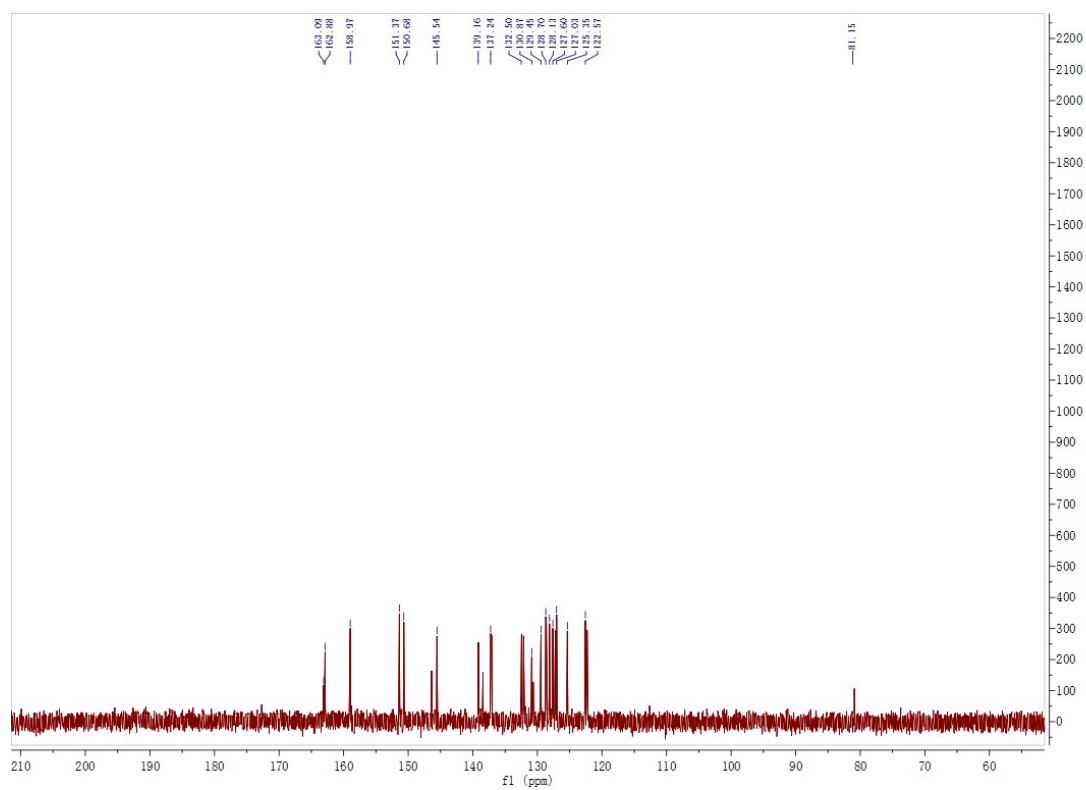

Figure S14  $^{13}\text{C}$  NMR spectrum of **3d** in DMSO- $d_6$ .

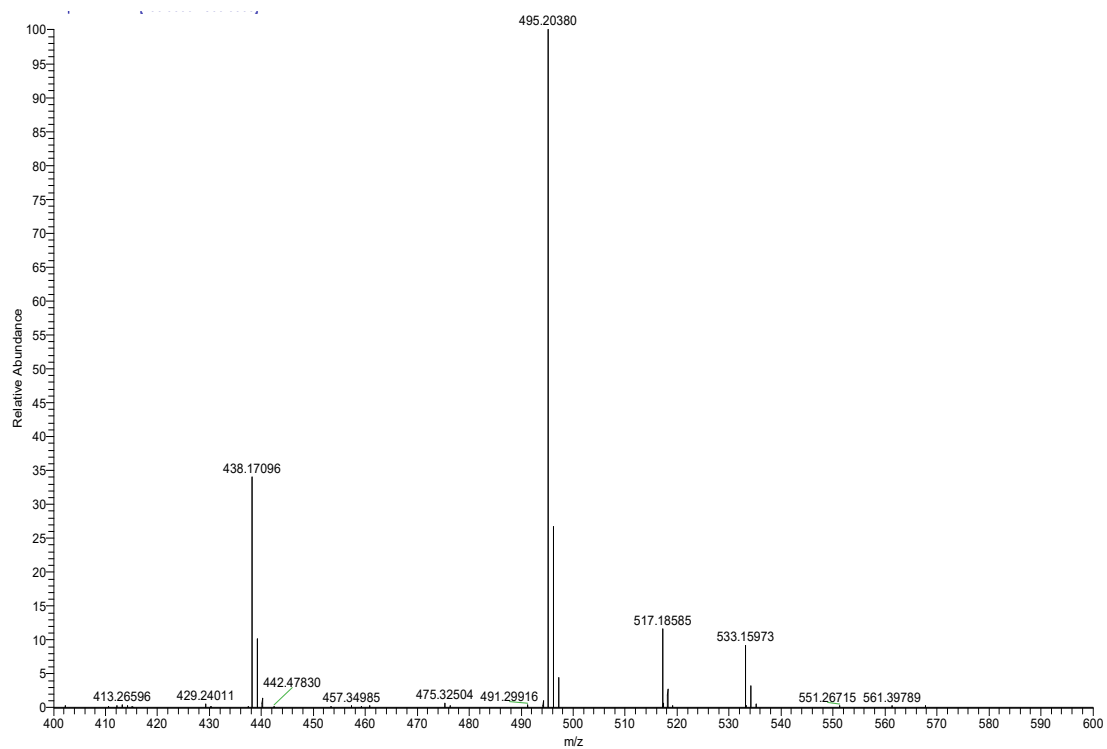

Figure S15 ESI-HRMS of **3d** atm/z 495.20380 for  $C_{30}H_{22}N_8 [M+H]^+$ .

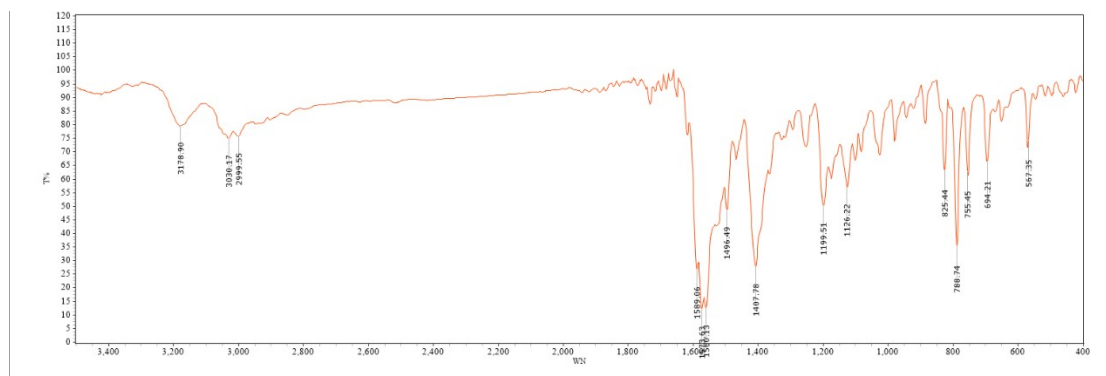

Figure S16 IR spectrum of **3d**.

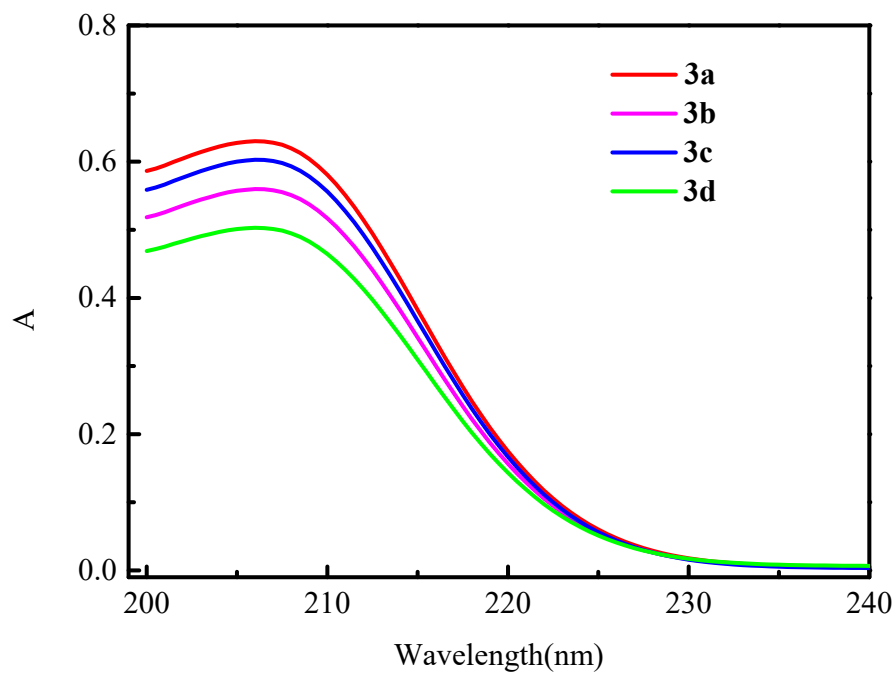

Figure S17 UV-vis spectra of 3a-3d.

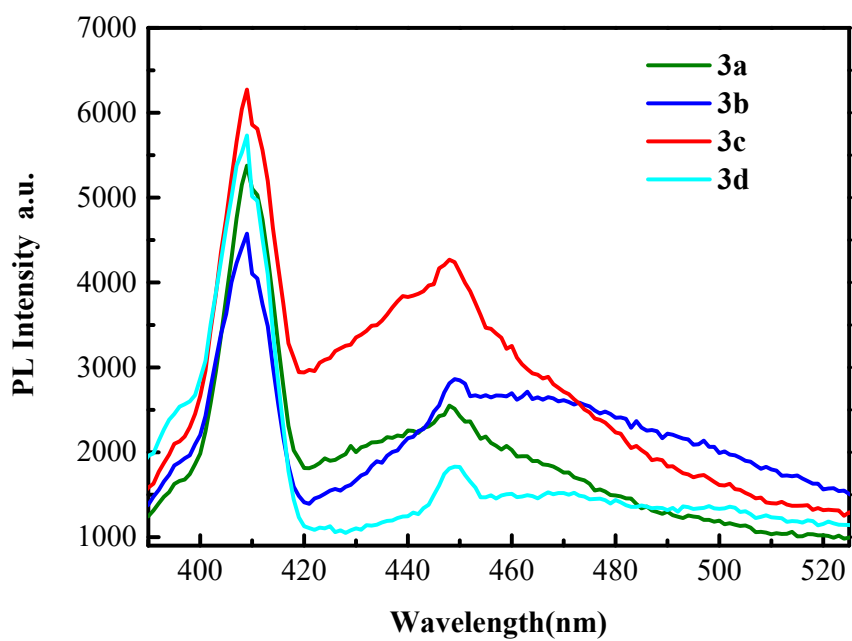

Figure S18 Fluorescence spectra of 3a-3d.

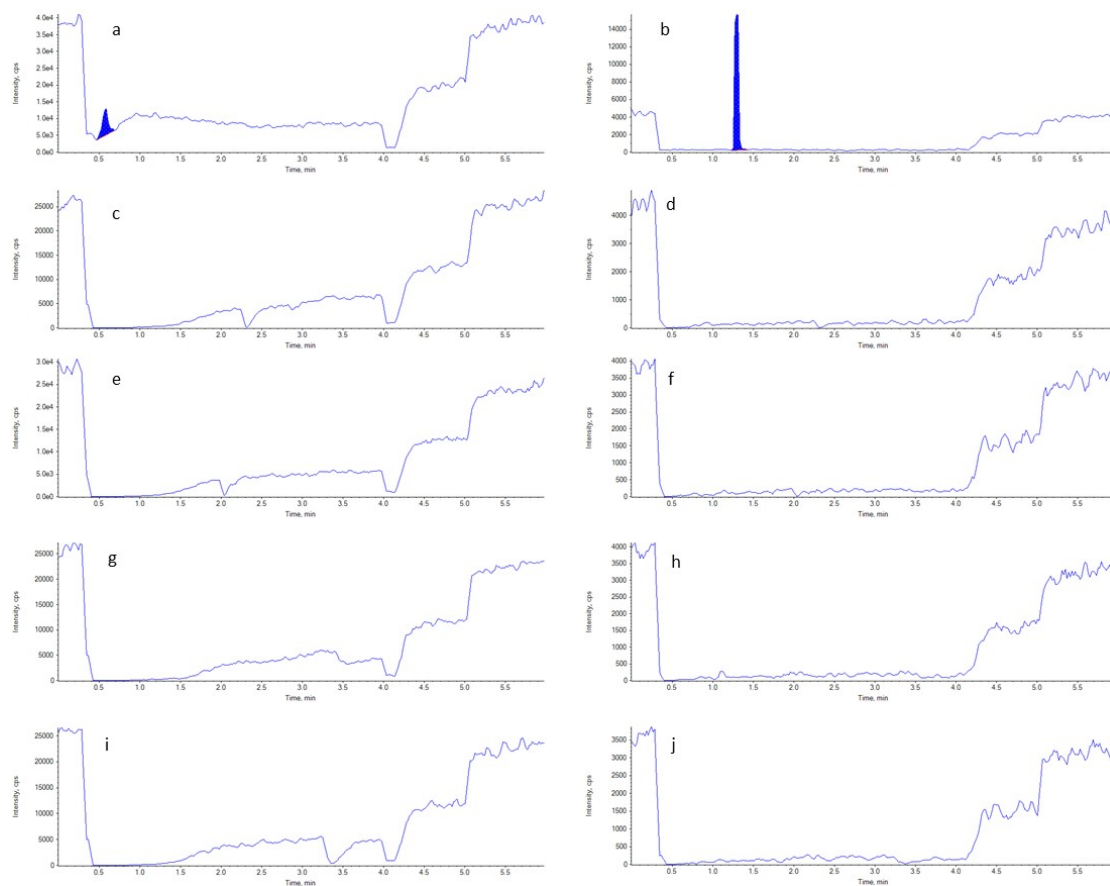

**Figure S19.** NDMA (a) and NDEA (b) represent the peaks on the chromatogram, as well as compound **3a** (c-d), **3b** (e-f), **3c** (g-h), **3d**(i-j) detection chromatograms. (NDMA: a, c, e, g, i; NDEA: b, d, f, h, j).

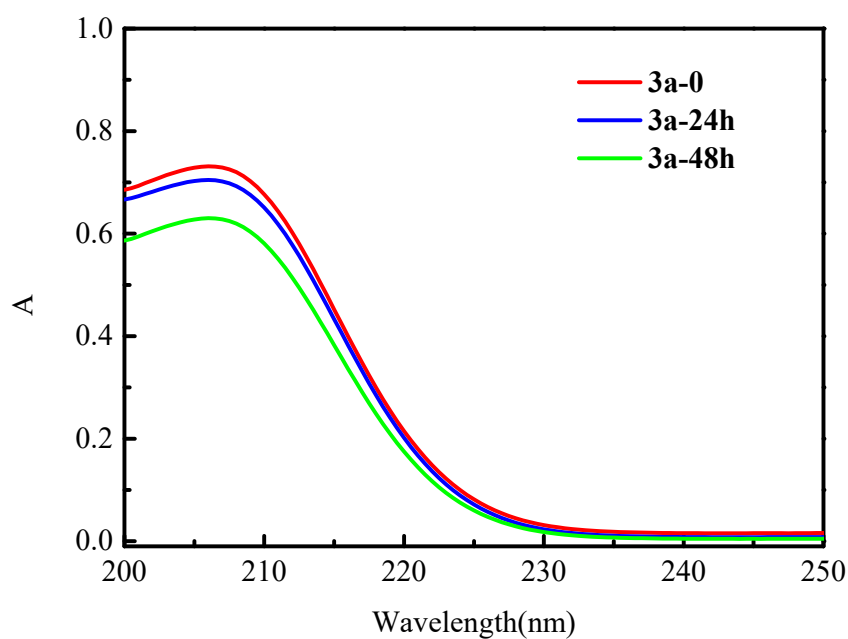

**Figure S20** The UV-vis spectra of **3a** within 48 h in Tris-HCl buffer (pH 7.4).

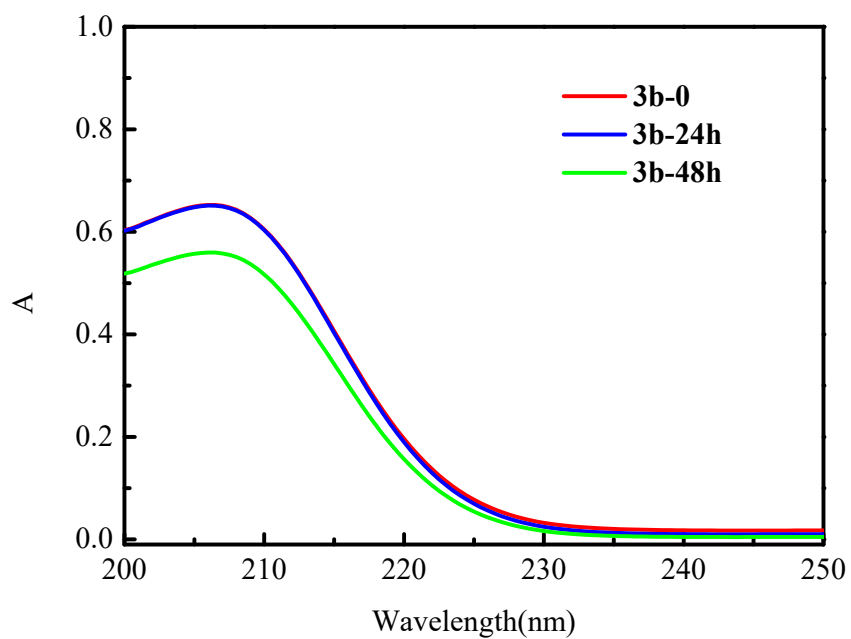

Figure S21 The UV-vis spectra of **3b** within 48 h in Tris-HCl buffer (pH 7.4).

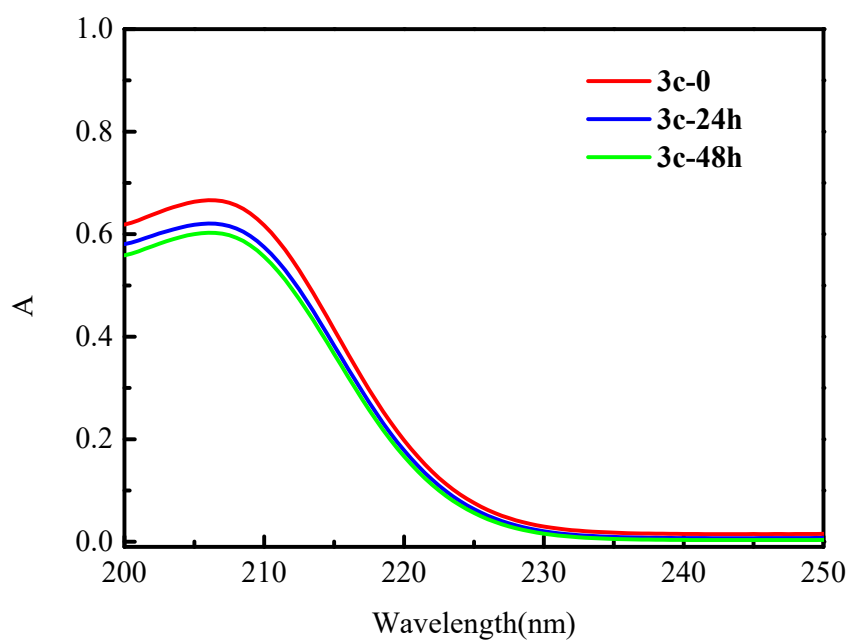

Figure S22 The UV-vis spectra of **3c** within 48 h in Tris-HCl buffer (pH 7.4).

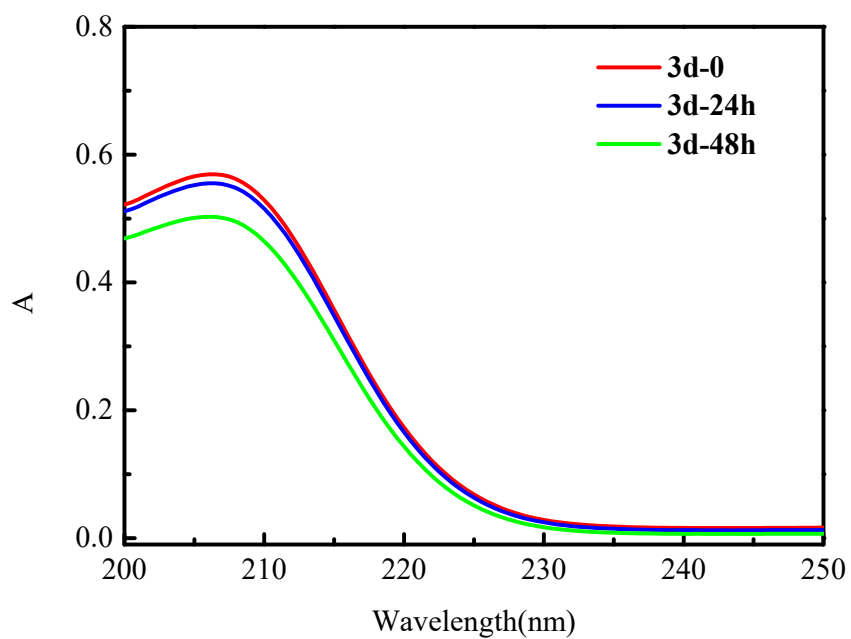

Figure S23 The UV-vis spectra of **3d** within 48 h in Tris-HCl buffer (pH 7.4).

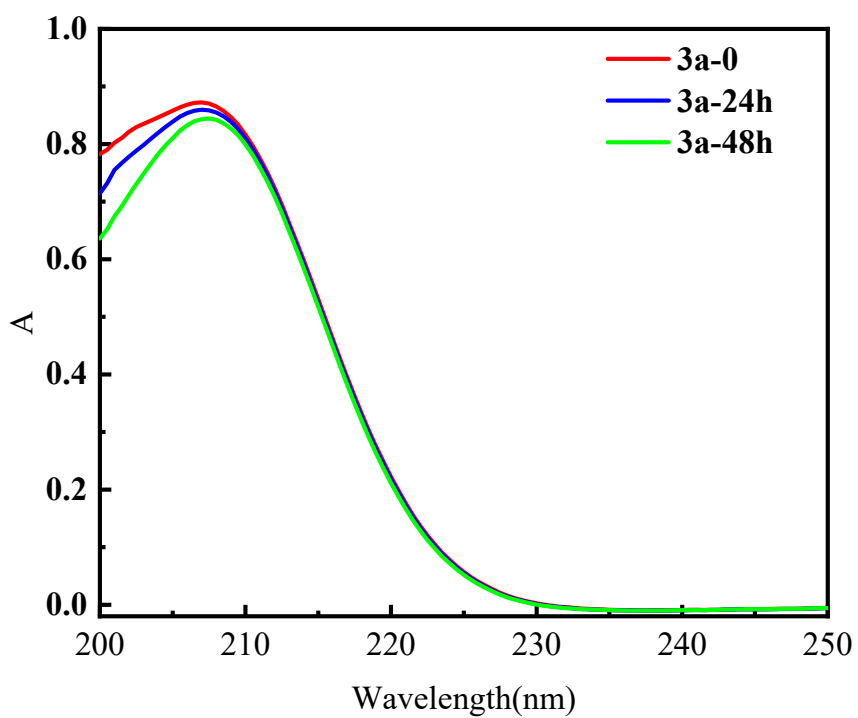

Figure S24 The UV-vis spectra of **3a** within 48 h in PBS buffer (pH 7.4).

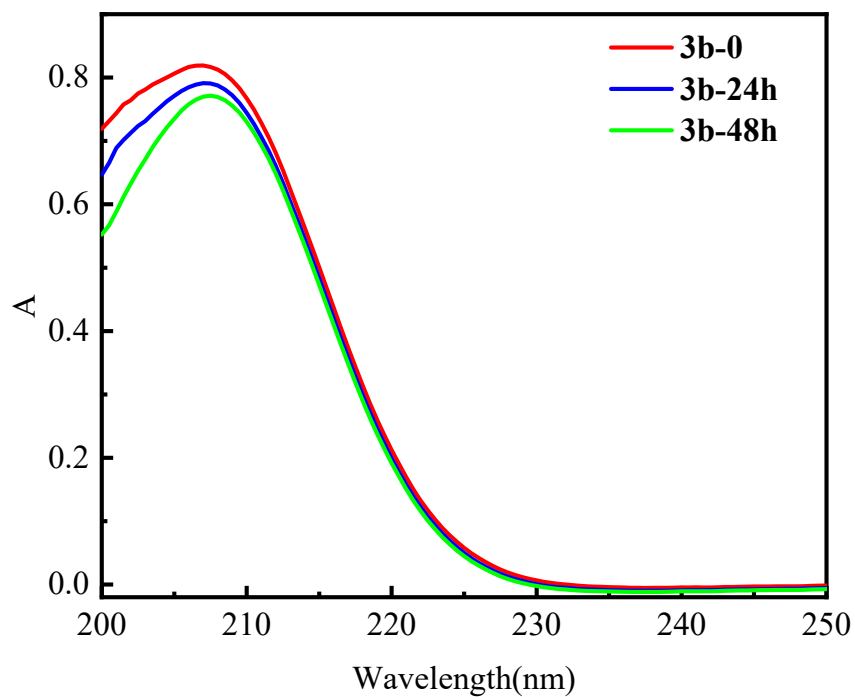

**Figure S25** The UV-vis spectra of **3b** within 48 h in PBS buffer (pH 7.4).

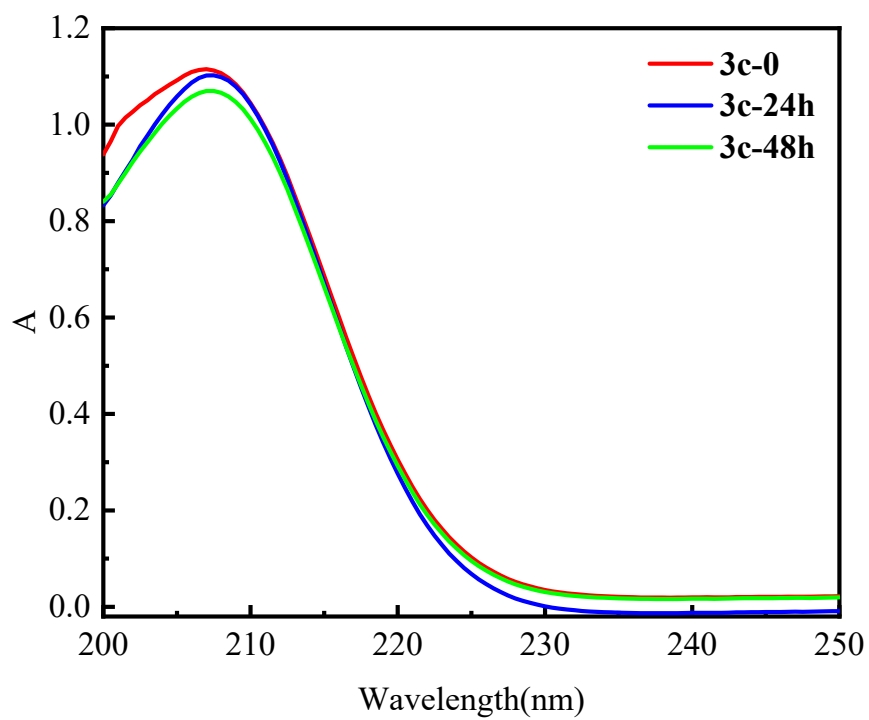

**Figure S26** The UV-vis spectra of **3c** within 48 h in PBS buffer (pH 7.4).

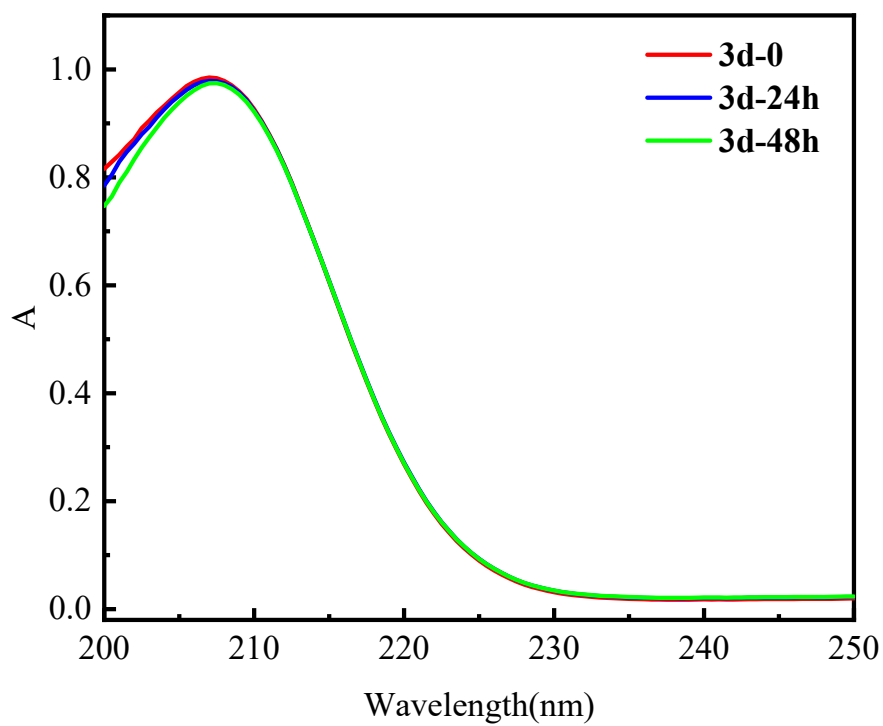

Figure S27 The UV-vis spectra of **3d** within 48 h in PBS buffer (pH 7.4).

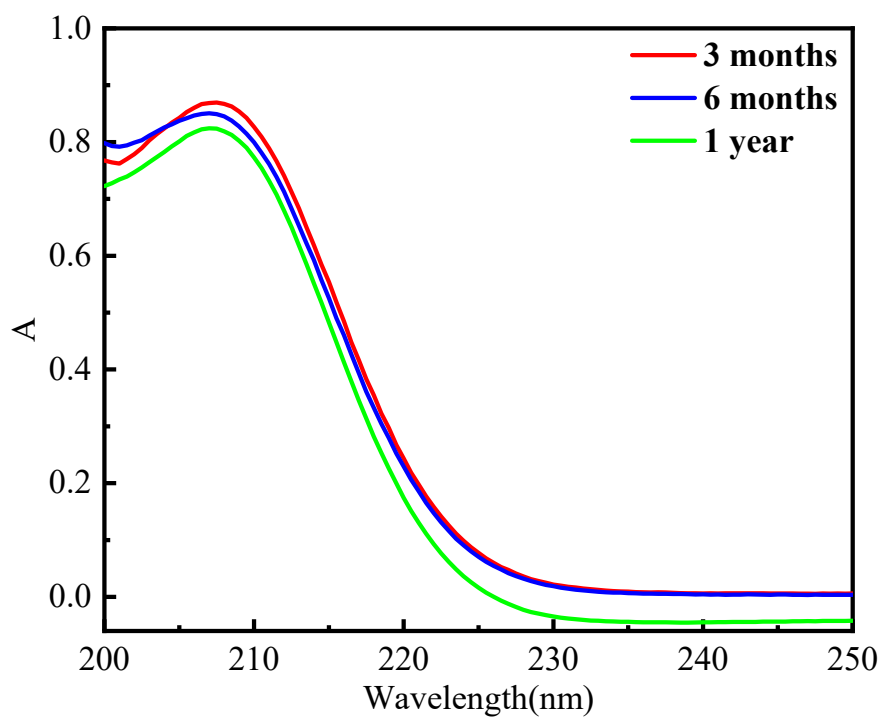

Figure S28 The UV-Vis spectra of **3a** in PBS buffer (pH 7.4) at 4°C



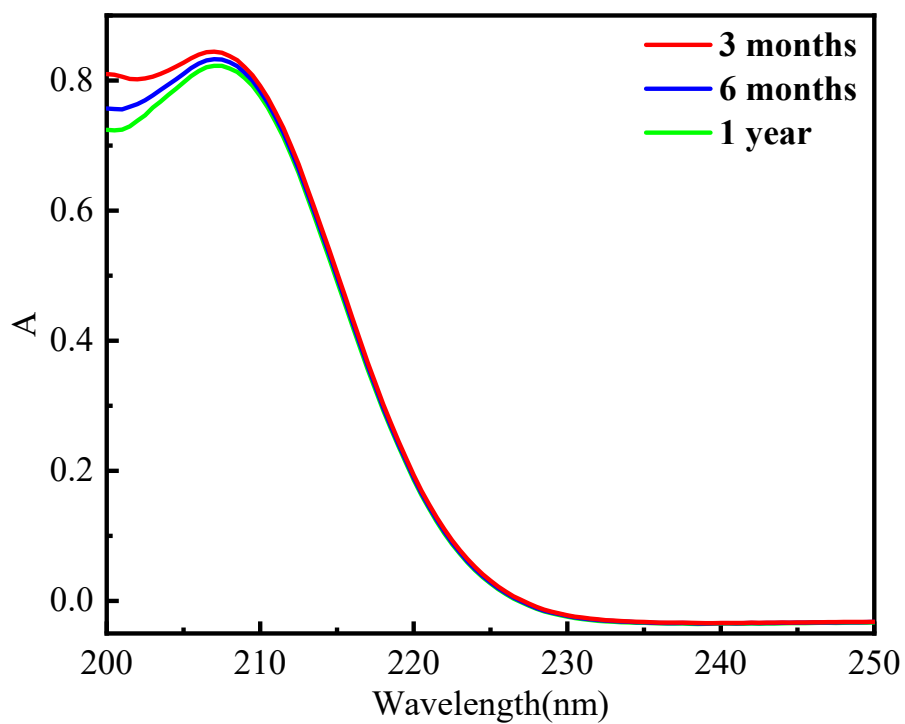

Figure S29 The UV-Vis spectra of **3b** in PBS buffer (pH 7.4) at 4°C

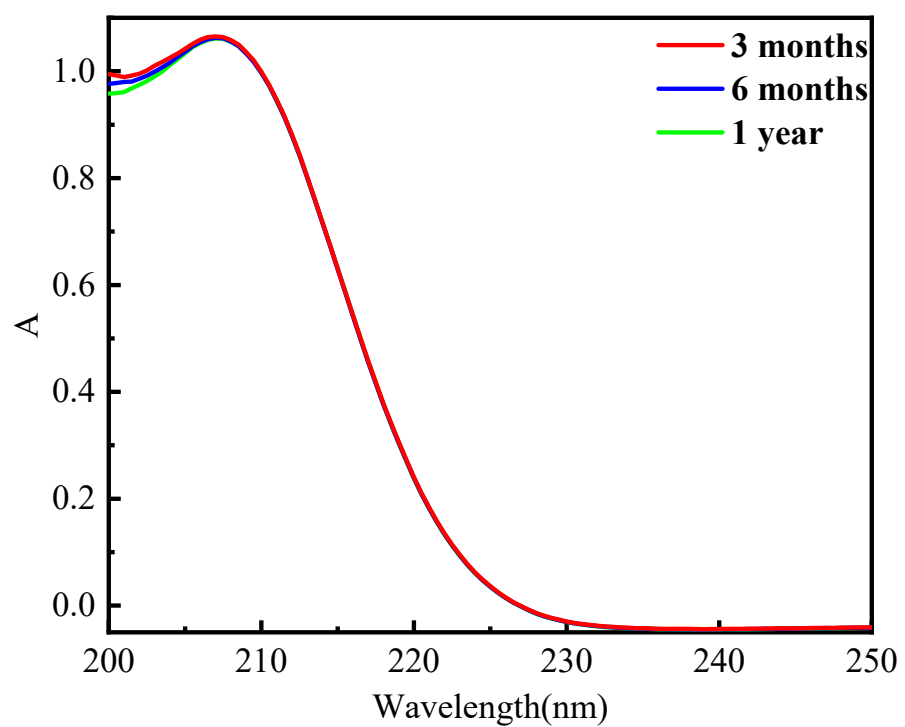

Figure S30 The UV-Vis spectra of **3c** in PBS buffer (pH 7.4) at 4°C

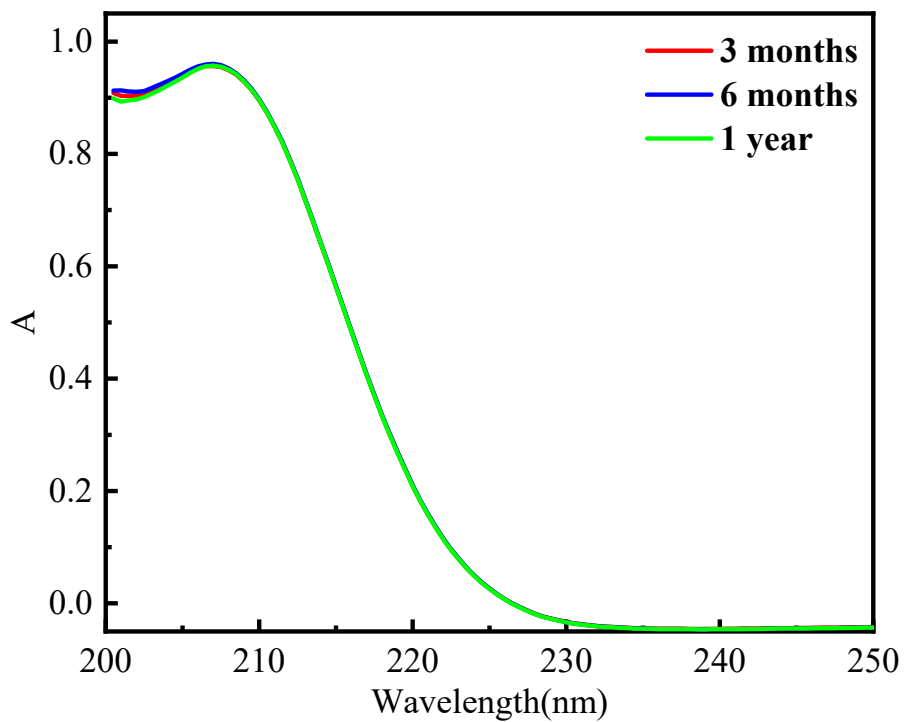

Figure S31 The UV-Vis spectra of 3d in PBS buffer (pH 7.4) at 4°C

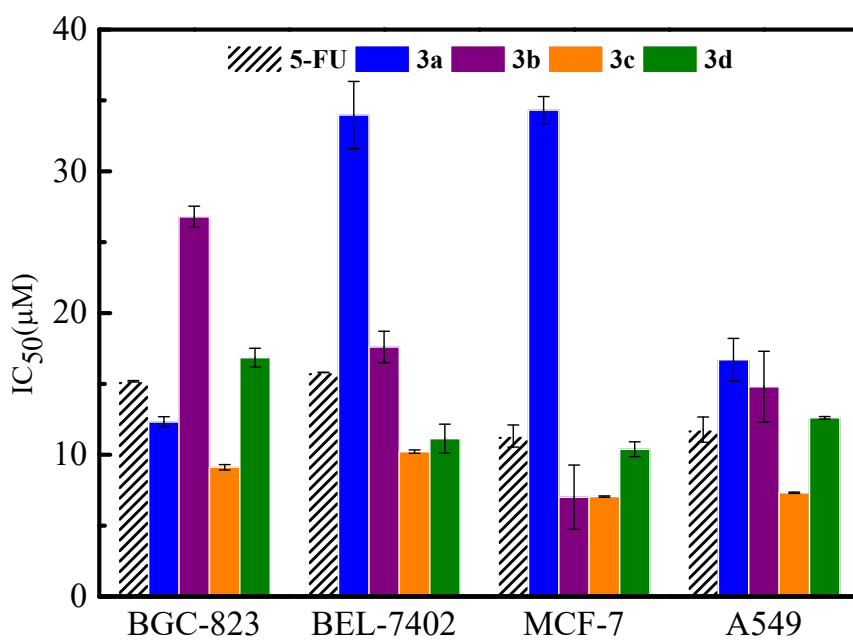

Figure S32 IC<sub>50</sub> values of 3a-3d against BGC-823, BEL-7402, A549 and MCF-7 cells for 48 h.

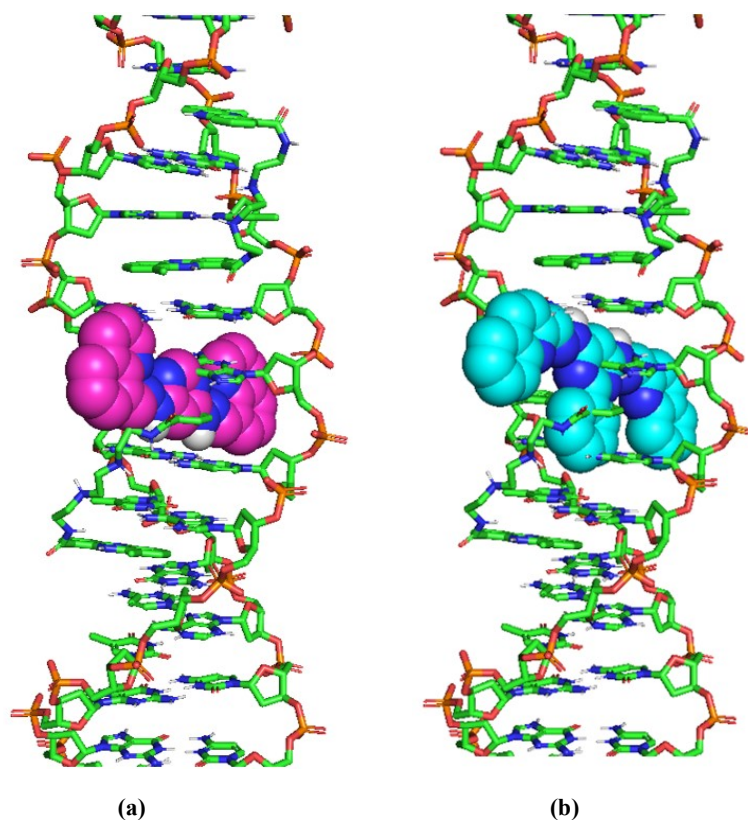

**Figure S33** Stacking-based visualizations of (a) **3b** and (b) **3c** docking with DNA (PDB ID: 2MG8).

**Table S1.** Summary of Potential Nitrosamine Impurities Risk Assessment in API.

| Number | Impurity Name                                  | Impurity structure                                                                  | Recommended Daily Allowance(AI Value) | Validation testing (Yes or no) |
|--------|------------------------------------------------|-------------------------------------------------------------------------------------|---------------------------------------|--------------------------------|
| 1      | NDMA                                           |  | 96 ng/day                             | Yes                            |
| 2      | NDEA                                           |  | 26.5 ng/day                           | Yes                            |
| 3      | N-Nitrosodimethylamine <b>2a</b> and <b>2b</b> |  | 1500 ng/day                           | No                             |
| 4      | Dual N-nitrosyl <b>2a</b> and <b>2b</b>        |  | 1500 ng/day                           | No                             |
| 5      | N-Nitrosamine <b>3a</b>                        |  | 1500 ng/day                           | No                             |
| 6      | Dual N-nitrosyl <b>3a</b>                      |  | 1500 ng/day                           | No                             |

|    |                           |  |             |    |
|----|---------------------------|--|-------------|----|
| 7  | N-Nitrosamine <b>3b</b>   |  | 1500 ng/day | No |
| 8  | Dual N-nitrosyl <b>3b</b> |  | 1500 ng/day | No |
| 9  | N-Nitrosamine <b>3c</b>   |  | 1500 ng/day | No |
| 10 | Dual N-nitrosyl <b>3c</b> |  | 1500 ng/day | No |
| 11 | N-Nitrosamine <b>3d</b>   |  | 1500 ng/day | No |
| 12 | Dual N-nitrosyl <b>3d</b> |  | 1500 ng/day | No |

**Table S2.** The  $\Delta G_b^\theta$  of **3a-3d** interacting with CDK2 (PDB ID: 4BGH).

| Compound  | $\Delta G_b^\theta$ (kcal/mol) |
|-----------|--------------------------------|
| <b>3a</b> | -8.0                           |
| <b>3b</b> | -8.6                           |
| <b>3c</b> | -8.4                           |
| <b>3d</b> | -8.3                           |

**Table S3.** The  $\Delta G_b^\theta$  of **3b** and **3c** interacting with CDK1 (PDB ID: 6GU7).

| Compound  | $\Delta G_b^\theta$ (kcal/mol) |
|-----------|--------------------------------|
| <b>3b</b> | -9.2                           |
| <b>3c</b> | -9.6                           |

**Table S4.** The  $\Delta G_b^\theta$  of **3b** and **3c** interacting with CDK4 (PDB ID: 2W9Z).

| Compound  | $\Delta G_b^\theta$ (kcal/mol) |
|-----------|--------------------------------|
| <b>3b</b> | -7.3                           |
| <b>3c</b> | -7.8                           |

**Table S5.** The  $\Delta G_b^0$  of **3b** and **3c** interacting with CDK8 (PDB ID: 5I5Z).

| Compound  | $\Delta G_b^0$ (kcal/mol) |
|-----------|---------------------------|
| <b>3b</b> | -9.6                      |
| <b>3c</b> | -10.9                     |
